# Supplementary material for: Sex and Ethnic Disparities during COVID-19 Pandemic among Acute Coronary Syndrome Patients
Source: MDPI journal article supplement (doi:10.3390/hearts5010004), 2024-01-12
Supplement: s1 [file s1]

# Supplementary File

**Table S1.** Clinical Modification (ICD10-CM) coding system.

|                                         |                                                                                                                                                                                                                                                                                                                                                                                                                                                                                                                                                                                                                                                                                                                                                                                                                                                                                                                                                                                                                                                                                                                                                                                                                                                                                               |
|-----------------------------------------|-----------------------------------------------------------------------------------------------------------------------------------------------------------------------------------------------------------------------------------------------------------------------------------------------------------------------------------------------------------------------------------------------------------------------------------------------------------------------------------------------------------------------------------------------------------------------------------------------------------------------------------------------------------------------------------------------------------------------------------------------------------------------------------------------------------------------------------------------------------------------------------------------------------------------------------------------------------------------------------------------------------------------------------------------------------------------------------------------------------------------------------------------------------------------------------------------------------------------------------------------------------------------------------------------|
| <b>STEMI</b>                            | I21, I211, I212                                                                                                                                                                                                                                                                                                                                                                                                                                                                                                                                                                                                                                                                                                                                                                                                                                                                                                                                                                                                                                                                                                                                                                                                                                                                               |
| <b>NSTEMI</b>                           | I214, I222                                                                                                                                                                                                                                                                                                                                                                                                                                                                                                                                                                                                                                                                                                                                                                                                                                                                                                                                                                                                                                                                                                                                                                                                                                                                                    |
| <b>UA</b>                               | I25, I200, I222                                                                                                                                                                                                                                                                                                                                                                                                                                                                                                                                                                                                                                                                                                                                                                                                                                                                                                                                                                                                                                                                                                                                                                                                                                                                               |
| <b>Covid-19</b>                         | U071                                                                                                                                                                                                                                                                                                                                                                                                                                                                                                                                                                                                                                                                                                                                                                                                                                                                                                                                                                                                                                                                                                                                                                                                                                                                                          |
| <b>SHOCK</b>                            | R571, R578, R579, R6521                                                                                                                                                                                                                                                                                                                                                                                                                                                                                                                                                                                                                                                                                                                                                                                                                                                                                                                                                                                                                                                                                                                                                                                                                                                                       |
| <b>Mechanical support an intubation</b> | T884XXD, T88DXXS, T884XXA, T884,5A1522G, T844, SA1522G                                                                                                                                                                                                                                                                                                                                                                                                                                                                                                                                                                                                                                                                                                                                                                                                                                                                                                                                                                                                                                                                                                                                                                                                                                        |
| <b>PCI</b>                              | 02703ZZ, 02704ZZ, 02713ZZ, 02714ZZ, 02723ZZ, 02724ZZ, 02733ZZ, 02734ZZ PCI BMS 02703D6, 02703DZ, 02704D6, 02704DZ, 02703E6, 02703EZ, 02704E6, 02704EZ, 02703F6, 02703FZ, 02704F6, 02704FZ, 02703G6, 02703GZ, 02704G6, 02704GZ, 02713D6, 02713DZ, 02714D6, 02714DZ, 02713E6, 02713EZ, 02714E6, 02714EZ, 02713F6, 02713FZ, 02714F6, 02714FZ, 02713G6, 02713GZ, 02714G6, 02714GZ, 02723D6, 02723DZ, 02724D6, 02724DZ, 02723E6, 02723EZ, 02724E6, 02724E6, 02724EZ, 02723F6, 02723FZ, 02724F6, 02724FZ, 02723G6, 02723GZ, 02724G6, 02724GZ, 02733D6, 02733DZ, 02734D6, 02734DZ, 02733E6, 02733EZ, 02734E6, 02734EZ, 02733F6, 02733FZ, 02733G6, 02733GZ, 02734G6, 02734GZ PCI DES 0270346, 027034Z, 0270446, 027044Z, 0270356, 027035Z, 0270456, 027045Z, 0270366, 027036Z, 0270466, 027046Z, 0270376, 027037Z, 0270476, 027047Z, 0271346, 027134Z, 0271446, 027144Z, 0271356, 027135Z, 0271456, 027145Z, 0271366, 027136Z, 0270376, 0271466, 027146Z, 0271376, 027137Z, 0271476, 027147Z, 0272346, 027234Z, 0272446, 027244Z, 0272356, 027235Z, 0272456, 027245Z, 0272366, 027236Z, 027246Z, 0272376, 027237Z, 0272476, 027035Z, 027247Z, 0273346, 027334Z, 0273446, 027344Z, 0273356, 027335Z, 0273456, 027345Z, 0273366, 027336Z, 0273466, 027346Z, 0273376, 027337Z, 027045Z, 0273476, 027347Z |

**Table S2.** Inpatient Length of stay outcomes among ACS patients during 1st year of the pandemic 2020 and the pre pandemic year 2019. Race is presented in comparison to white/Caucasian patients while Female is presented in comparison to male patients. P-value  $\leq 0.05$  indicates significance.

|                           | 2020                            |         | 2019                            |         |
|---------------------------|---------------------------------|---------|---------------------------------|---------|
| <b>STEMI</b>              | Mean (95 % confidence interval) | P value | Mean (95 % confidence interval) | P value |
| African American          | 0.057 (-0.06-0.17)              | 0.32    | 0.19 (0.09-0.30)                | <0.01   |
| Hispanic                  | 0.21 (0.08-0.34)                | <0.01   | 0.12 (0.002- 0.23)              | 0.04    |
| Asian or Pacific Islander | 0.30 (0.09-0.50)                | <0.01   | 0.32 (0.14- 0.49)               | <0.01   |
| Native American           | 0.11(- 0.26- 0.48)              | 0.59    | 0.06 (-0.26- 0.37)              | 0.72    |
| Others                    | 0.15 (0.02- 0.33)               | 0.08    | 0.23 (0.05- 0.42)               | <0.01   |
| <b>Female</b>             | -0.03 (-0.09- 0.02)             | 0.29    | -0.01 (-0.06- 0.03)             | 0.55    |
| <b>NSTEMI/UA</b>          |                                 |         |                                 |         |
| African American          | -0.08(-0.19- 0.04)              | 0.20    | -0.05 (-0.15-0.04)              | 0.31    |
| Hispanic                  | -0.04 (-0.16- 0.08)             | 0.48    | - 0.15 (-0.28- -0.02)           | 0.01    |
| Asian or Pacific Islander | 0.26 (0.06- 0.45)               | 0.01    | 0.07 (-.11- 0.26)               | 0.42    |
| Native American           | 0.98 (-0.25- 0.45)              | 0.54    | -0.22 (-0.49- 0.04)             | 0.10    |
| Others                    | -0.002 ( -0.19- 0.18)           | 0.98    | -0.03 ( -0.26- 0.19)            | 0.74    |
| <b>Female</b>             | -0.22 ( -0.27- -0.16)           | <0.01   | -0.24 (-0.29- 0.19)             | <0.01   |

**Table S3:** Inpatient hospital cost outcomes among ACS patients during 1st year of the pandemic 2020 and the pre pandemic year 2019. Race is presented in comparison to white/Caucasian patients while Female is presented in comparison to male patients. P-value  $\leq 0.05$  indicates significance.

|                           | 2020                                   |                | 2019                                   |                |
|---------------------------|----------------------------------------|----------------|----------------------------------------|----------------|
| <b>STEMI</b>              | <b>Mean (95 % confidence interval)</b> | <b>P value</b> | <b>Mean (95 % confidence interval)</b> | <b>P value</b> |
| African American          | -10426.3(-13763.2-7089.5)              | <0.01          | -7122.4 (-10341.1- -3903.6)            | <0.01          |
| Hispanic                  | 14463.7 (8808.4-200188.9)              | <0.01          | 12216.6 (7155.5- 17277.6)              | <0.01          |
| Asian or Pacific Islander | 11557.7(3264.2-19851.1)                | <0.01          | 12590.5 (4062.9- 21117.9)              | <0.01          |
| Native American           | 15430.9(-25156.4- -5707.6)             | <0.01          | -7989.1 (8475.7 (24382.6)              | 0.10           |
| Other races               | 15798.8 (7254.49- 24343.1)             | <0.01          | 16429.7 (8475.8- 24382.6)              | <0.01          |
| <b>Female</b>             | -12094.1 (-13473.0- - 10715.2)         | <0.01          | -11634.0 (-12829.8- - 10438.9)         | <0.01          |
| <b>NSTEMI/UA</b>          |                                        |                |                                        |                |
| African American          | -1112.5 (-15988.8- -6236.2)            | <0.01          | -11653 (-14969.8- -8336.1)             | <0.01          |
| Hispanic                  | -912.4 ( -9258.8- 7433.9)              | 0.83           | 8914.6(3473.4- 14355.9)                | <0.01          |
| Asian or Pacific Islander | 6538.9 (-3129.7- 16207.6)              | 0.18           | 12483.5 (4494.3- 20472.7)              | <0.01          |
| Native American           | -14276.1 (-26748.4- -1803.7)           | 0.02           | -16456.5 ( -24433.6- -8479.6)          | <0.01          |
| Others                    | 10012.8 ( -1619.4- 21645.0)            | 0.09           | 11628.4 (3348.7- 19908.1)              | <0.01          |
| <b>Female</b>             | -14967.3 (-17321.2- -12613.3)          | <0.01          | -15243.6 (-16541.9- 13945.2)           | <0.01          |

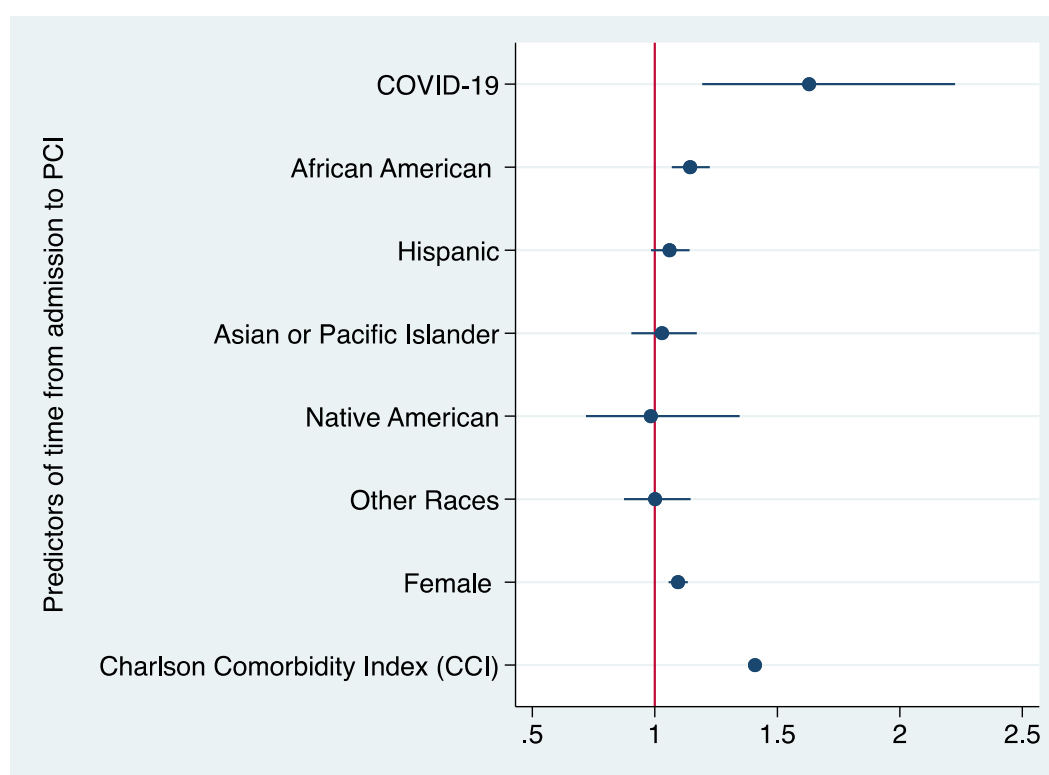

**Figure S1.** Predictors of time from admission to PCI among UA/NSTEMI patients during 1<sup>st</sup> year of the pandemic 2020. UA: Unstable Angina, NSTEMI: None ST-segment elevated myocardial infarction.
